# Supplementary material for: A smoking quitline integrated with clinician counselling at outpatient health facilities in Vietnam: a single-arm prospective cohort study
Source: Springer Nature journal article supplement (doi:10.1186/s12889-022-13203-y), 2022-04-13
Supplement: MOESM1 [file 20309830]

**Supplementary Table S1. Text message schedule**

| Day | SMS type  | Tailored information                                                                                             | SMS content                                                                                                                                                             |
|-----|-----------|------------------------------------------------------------------------------------------------------------------|-------------------------------------------------------------------------------------------------------------------------------------------------------------------------|
| 1   | Admin     | Male                                                                                                             | Dear Mr. NAME, welcome to VCAPS smoking cessation intervention. Congratulations on your decision to manage your smoking. We are here to help you prepare                |
|     |           | Female                                                                                                           | Dear Miss NAME, welcome to VCAPS smoking cessation intervention. Congratulations on your decision to manage your smoking. We are here to help you prepare               |
| 2   | Admin     | Quit date                                                                                                        | Well done for setting up your quit date on DATE. Let's prepare for it together!                                                                                         |
| 3   | Strategy  |                                                                                                                  | From now on, don't smoke inside your home or inside your car. Go outside if you want to smoke.                                                                          |
| 4   | Admin     |                                                                                                                  | Managing smoking works best when you're prepared. Stick with us. We'll show you some strategies to deal with cravings and difficult situations over the next few weeks. |
| 5   | Strategy  | Answered Yes to the question "Do you drink coffee/tea/colas every day?"                                          | We know you love drink coffee/tea/colas. Try to cut the drink in half. It helps reduce your discomfort after you stop smoking.                                          |
|     |           | Answered No to the question "Do you drink coffee/tea/colas every day?"                                           | Avoid drink too much coffee/tea/colas. It will help you manage your smoking.                                                                                            |
| 6   | Strategy  | Answered Yes to the question "Do you smoke water pipes?"                                                         | Do you smoke water pipes? Water pipes are not a safe alternative. If fact, water pipes might be worse to your health than manufactured cigarettes                       |
|     |           | Answered No to the question "Do you smoke water pipes?"                                                          | There is no such thing as safe tobacco. Hand rolled cigarettes, waterpipes, and cigars carry the same health risks as manufactured cigarettes.                          |
| 7   | Encourage | Male                                                                                                             | Smoking causes erectile dysfunction. You have made a right decision to manage your smoking.                                                                             |
|     |           | Female                                                                                                           | Smoking can cause many diseases, including cancer, stroke, heart disease, and blindness. Feel proud of yourself for deciding to quit.                                   |
| 8   | Strategy  | Answered Yes to the question "Do you live with a smoker?"                                                        | Remember the smoking outside strategy? It applies to everyone living with you. No one smoke inside!                                                                     |
|     |           | Answered No to the question "Do you live with a smoker?"                                                         | Share with your family that you are quitting smoking. Someone might be willing to support and encourage you.                                                            |
| 9   | Strategy  | Answered 30 minutes or less to the question "How soon after you wake up do you usually have your first smoke?"   | If you want to smoke right after you wake up, it means your body is special and needs more assistance. Don't worry because we are here.                                 |
|     |           | Answered more than 30 minutes to the question "How soon after you wake up do you usually have your first smoke?" | Do you believe you can stop smoking? We do because our trained Quitline counsellors are ready to assist you.                                                            |
| 10  | Encourage |                                                                                                                  | Isn't it good to your family that you start to do something to manage your smoking? Everyone in the family will become healthier.                                       |
| 11  | Admin     |                                                                                                                  | Remember you can call the VCAPS Quitline at 1800 6276 if you need help                                                                                                  |

|    |           |                                                                                 |                                                                                                                                                              |
|----|-----------|---------------------------------------------------------------------------------|--------------------------------------------------------------------------------------------------------------------------------------------------------------|
| 12 | Encourage | Overall progress not so good, indicated by the counsellor after the 1-week call | We know it is hard but it is a decision you will not regret. Keep getting the support you need and remind yourself of your reasons to stop smoking.          |
|    |           | Overall good progress, indicated by the counsellor after the 1-week call        | You are on the right track! Stop smoking is hard but stay confident. You can do this.                                                                        |
| 13 | Strategy  | Answered Yes to the question "Have you tried to quit smoking?"                  | Think about what strategies worked and what did not work well during your previous quit attempt. Use your past experience to help yourself.                  |
|    |           | Answered No to the question "Have you tried to quit smoking?"                   | Be proud of yourself for deciding to stop smoking. Let's do it and make you a non-smoker.                                                                    |
| 14 | Strategy  |                                                                                 | Think again your strategies to deal with cravings. If you don't have any strategy or are not sure about them, call the Quitline to get help.                 |
| 15 | Strategy  |                                                                                 | Knowing your triggers helps you learn how to deal with them. Talk to your Quitline counsellor and write down your top 3 triggers and your coping strategies. |
| 16 | Encourage |                                                                                 | If you're feeling cranky it could be because you're stopping smoking. This is only temporary. Call the Quitline if you need to talk about your mood.         |
| 17 | Strategy  | Answered Yes to the question "Do you drink alcohol every day?"                  | Would you like to reduce alcohol? It will help with your plan to stop smoking. And remember, don't smoke while you drink.                                    |
|    |           | Answered No to the question "Do you drink alcohol every day?"                   | It is good that you don't drink alcohol very often. Keep yourself away from alcohol.                                                                         |
| 18 | Encourage | Overall progress not so good, indicated by the counsellor after the 2-week call | We know it is hard to persist. Believe in yourself and Keep getting the support you need to stop smoking.                                                    |
|    |           | Overall good progress, indicated by the counsellor after the 2-week call        | Good job! You are on the right track! Believe in yourself that you can become a nonsmoker.                                                                   |
| 19 | Admin     |                                                                                 | Call the Quitline at 1800 6276 if you need assistance from the Quitline counsellor for dealing with cravings                                                 |
| 20 | Strategy  | Answered Yes to the question "Do you roll your own cigarettes?"                 | Hand rolled cigarettes are not less harmful than ordinary cigarettes. They cause the same serious problems to your health.                                   |
|    |           | Answered No to the question "Do you roll your own cigarettes?"                  | Some people say hand rolled cigarettes are less harmful. It's not true.                                                                                      |
| 21 | Strategy  | Answered Yes to the question "Are most of your friends smokers?"                | It's not easy if you are surrounded by smoking friends. Can you find someone from your friends who also want to stop smoking?                                |
|    |           | Answered No to the question "Are most of your friends smokers?"                 | Hang out with your friends in places where smoking is not allowed. It helps you manage your smoking.                                                         |
| 22 | Strategy  |                                                                                 | Urges for smoking often get away in few minutes. Get a quick exercise or eat a small snack.                                                                  |
| 23 | Admin     |                                                                                 | Call the Quitline at 1800 6276 if you need help with your cravings or withdrawal symptoms                                                                    |
| 24 | Strategy  |                                                                                 | Be careful when you go to a party or a smoking area. Do not let yourself slip. You have done so much.                                                        |

|    |           |                                                            |                                                                                                                                                 |
|----|-----------|------------------------------------------------------------|-------------------------------------------------------------------------------------------------------------------------------------------------|
| 25 | Encourage | Participant indicated still smoking during the 3-week call | Stop smoking is difficult for some people. Let's keep trying. Call the Quitline if you are ready to choose a quit date.                         |
|    |           | Participant indicated not smoking during the 3-week call   | Congratulations on your progress! Keep your great work. We believe in you.                                                                      |
| 26 | Strategy  |                                                            | Remember, no one can smoke inside your house or inside your car.                                                                                |
| 27 | Encourage |                                                            | You may feel strange when you stop smoking. This is withdrawal because your body is used to smoking. These feelings will go away in few weeks.  |
| 28 | Strategy  |                                                            | Even the strongest cravings will go away after a few minutes. Focus on something else and remind yourself why you want to be smokefree.         |
| 29 | Strategy  |                                                            | Researse beforehand in your mind how to resist if you are going to a place or party where people may offer you cigarettes.                      |
| 30 | Strategy  |                                                            | Gaining a few extra kilograms after stop smoking is normal. Eat healthy and exercise can prevent most of this weight gain.                      |
| 31 | Encourage |                                                            | Can you see yourself as a nonsmoker? Trust yourself. You can make it happen.                                                                    |
| 32 | Encourage | Participant indicated still smoking during the 4-week call | Stop smoking is difficult for some people. Let's keep trying. Call the Quitline if you are ready to choose a quit date.                         |
|    |           | Participant indicated not smoking during the 4-week call   | Congratulations on your progress! Keep your great work. We believe in you.                                                                      |
| 33 | Strategy  |                                                            | If you are in a bad mood, talk about it with the Quitline counsellor or someone who supports you. Remember, your feelings matter.               |
| 34 | Strategy  |                                                            | When you want to have just one cigarette, don't think it's just one cigarette. Most people start regular smoking again after "just having one". |
| 35 | Encourage |                                                            | Stay positive. Do not let things get you down. Your journey to a smokefree life might be a struggle, but looking back it will be well worth it. |
| 37 | Strategy  |                                                            | Don't let your friends smoke around you. Ask them to smoke outside or you can hang out with them in non-smoking places.                         |
| 38 | Encourage |                                                            | Value your future. No matter when you quit, you are adding years to your life. You will not regret this.                                        |
| 40 | Strategy  |                                                            | If you gain a lot of weight, go to see a doctor and seek medical advice.                                                                        |
| 42 | Encourage |                                                            | After you stop smoking, your lungs begin to improve and your heart attack risk begins to drop                                                   |
| 44 | Strategy  |                                                            | Practice in your head scenarios that might cause you to slip. Remember, do think it's just one cigarettes.                                      |
| 45 | Admin     |                                                            | If you smoke again, call the Quitline at 1800 6276 to discuss the next step. Don't feel embarassed. We want to help you.                        |
| 47 | Encourage |                                                            | Can you feel it? Urges are getting weaker and less frequent over time.                                                                          |
| 49 | Encourage |                                                            | Do you know how much money you spend on cigarettes? Think about what else you could do with that money.                                         |

|    |           |  |                                                                                                                         |
|----|-----------|--|-------------------------------------------------------------------------------------------------------------------------|
| 51 | Admin     |  | We are sending less texts. But we are still here to help you.                                                           |
| 53 | Strategy  |  | How well did your coping strategies work? Talk to the Quitline counsellor if your strategies were not helpful.          |
| 55 | Encourage |  | Cigarettes never solved a problem for you. You did it yourself. You can do great things, so keep thinking positively    |
| 58 | Encourage |  | There are so many benefits to being smokefree. What do you look forward to the most?                                    |
| 60 | Strategy  |  | No one smokes inside your house or inside your car. Anyone who wants to smoke should go outside.                        |
| 62 | Admin     |  | Call the Quitline at 1800 6276 if you start smoking again. Our counsellor will discuss with you what we can do for you. |
| 65 | Strategy  |  | How have you been feeling? Talk to your family or a friend if you are in a bad mood.                                    |
| 68 | Encourage |  | You and your family are becoming healthier after you stop smoking. It's well worth it. Hang on to it.                   |
| 72 | Admin     |  | Don't forget that you can call the Quitline at 1800 6276 if you need assistance.                                        |
| 76 | Strategy  |  | Don't forget your strategies for urges and difficult situations. Remind yourself and practice in your mind.             |
| 80 | Encourage |  | Do you feel more comfortable and more confident after stop smoking? Feel proud of yourself for doing so much.           |
| 85 | Admin     |  | This is the last text. Good luck. You can still call the Quitline if you need support                                   |

**Supplementary Table S2. Text message schedule around the target quit date**

| <b>Day</b>   | <b>SMS type</b> | <b>SMS content</b>                                                                                                                                   |
|--------------|-----------------|------------------------------------------------------------------------------------------------------------------------------------------------------|
| 1 day before | Strategy        | Tomorrow is the day, you can do it and we are here to help. Review your coping strategies again.                                                     |
| Quit date    | Admin           | It's time to stop smoking. Call the quitline at 1800 6276 if you need any help.                                                                      |
| 1 day after  | Strategy        | Cravings to smoke only last for a few minutes. Take a quick walk or do a short exercise when you want to smoke.                                      |
| 2 days after | Strategy        | Keep some sweet snacks in your purse or pocket. Take the snack instead of a cigarette next time you have a craving.                                  |
| 3 days after | Strategy        | Avoid drink alcohol in the first 2 weeks will be helpful for managing your smoking.                                                                  |
| 4 days after | Strategy        | Stress and anger are smoking triggers. If you're feeling stressed or upset. Call the quitline to get extra help. Or talk to your family or a friend. |
| 5 days after | Encourage       | "It always seems impossible until it is done." Never give up and don't be discouraged.                                                               |
| 6 days after | Strategy        | When you go out, choose non-smoking venues like the movies. This will help reduce your urges.                                                        |
| 7 days after | Encourage       | 1 week smokefree! Do not look back now. Mark your calendar and do something special today to celebrate this milestone!                               |

**Supplementary Table S3. Comparison of characteristics by participants' smoking status at the end of study**

| Characteristic                                               | Continuing to smoke at 12 months (Group A) | Self-reported smoking cessation at 12 months (Group B) | Biochemically-verified smoking cessation at 12 months (Group C) | P-value for statistical analysis* | P-value for pairwise comparisons |
|--------------------------------------------------------------|--------------------------------------------|--------------------------------------------------------|-----------------------------------------------------------------|-----------------------------------|----------------------------------|
| Total                                                        | 128                                        | 77                                                     | 13                                                              |                                   |                                  |
| <b>Demographic factors</b>                                   |                                            |                                                        |                                                                 |                                   |                                  |
| Age, median years (IQR)                                      | 50 (37.5 – 59)                             | 50 (38 – 61)                                           | 56 (51 – 61)                                                    | 0.2096                            |                                  |
| Highest level of education attained, n (%)                   |                                            |                                                        |                                                                 | 0.9052                            |                                  |
| Less than primary                                            | 2 (0.6)                                    | 1 (1.3)                                                | 0 (0)                                                           |                                   |                                  |
| Primary                                                      | 2 (1.6)                                    | 3 (3.9)                                                | 0 (0)                                                           |                                   |                                  |
| Lower secondary                                              | 52 (40.6)                                  | 32 (41.6)                                              | 6 (46.2)                                                        |                                   |                                  |
| Upper secondary                                              | 47 (36.7)                                  | 25 (32.5)                                              | 6 (46.2)                                                        |                                   |                                  |
| University degree, or equivalent, or higher                  | 25 (19.5)                                  | 16 (20.8)                                              | 1 (7.7)                                                         |                                   |                                  |
| <b>Smoking-related factors</b>                               |                                            |                                                        |                                                                 |                                   |                                  |
| Median average number of cigarettes/day (IQR)*               | 20 (10 – 30)                               | 20 (10 – 30)                                           | 10 (5 – 17.5)                                                   | 0.4757                            |                                  |
| Score on the Fagerström Test for Cigarette Dependence (IQR)* | 6 (5 – 8)                                  | 6 (5 – 7)                                              | 5 (2.5 – 6)                                                     | 0.0988                            |                                  |
| Median years smoking (IQR)                                   | 22 (15 – 40)                               | 30 (15 – 40)                                           | 30 (30 – 36)                                                    | 0.6190                            |                                  |
| Ever attempted to quit in the past, n (%)                    | 92 (71.9)                                  | 60 (77.9)                                              | 9 (69.2)                                                        | 0.5876                            |                                  |
| Drink alcohol every day, n (%)                               | 44 (34.4)                                  | 33 (42.9)                                              | 3 (23.1)                                                        | 0.2735                            |                                  |
| Drink caffeinated drinks every day, n (%)                    | 95 (74.2)                                  | 50 (64.9)                                              | 10 (76.9)                                                       | 0.3255                            |                                  |
| Living with at least one other smoker, n (%)                 | 32 (25.0)                                  | 17 (22.1)                                              | 3 (23.1)                                                        | 0.8911                            |                                  |
| Reasons given to quit, n (%)                                 |                                            |                                                        |                                                                 |                                   |                                  |
| Personal health condition                                    | 123 (96.1)                                 | 73 (94.8)                                              | 12 (92.3)                                                       | 0.7839                            |                                  |
| Family's health                                              | 15 (11.7)                                  | 11 (14.3)                                              | 2 (15.4)                                                        | 0.8341                            |                                  |

|                                                                     |            |           |           |                   |                                                                                           |
|---------------------------------------------------------------------|------------|-----------|-----------|-------------------|-------------------------------------------------------------------------------------------|
| Expense                                                             | 8 (6.3)    | 1 (1.3)   | 0 (0)     | 0.1675            |                                                                                           |
| <b>Quitting-related factors</b>                                     |            |           |           |                   |                                                                                           |
| Advised to quit by referral doctor, n (%) <sup>†</sup>              | 103 (87.3) | 64 (90.1) | 11 (100)  | 0.4051            |                                                                                           |
| Received written material from referring doctor, n (%) <sup>‡</sup> | 68 (57.6)  | 40 (56.3) | 6 (54.6)  | 0.9711            |                                                                                           |
| Days from baseline to target quit date, n (%)                       |            |           |           | <b>0.0293</b>     | Group A vs Group B = 0.1294<br>Group A vs Group C = 0.0193<br>Group B vs Group C = 0.0699 |
| Less than 14 days                                                   | 87 (68.5)  | 62 (79.5) | 11 (100)  |                   |                                                                                           |
| 14 days or more, or did not commit to a target quit date            | 40 (31.5)  | 16 (20.5) | 0 (0)     |                   |                                                                                           |
| Number of successful counselling phone calls, median (IQR)          | 7 (5 – 8)  | 8 (7 – 8) | 8 (7 – 8) | <b>&lt;0.0001</b> | Group A vs Group B = 0.0004<br>Group A vs Group C = 0.0439<br>Group B vs Group C = 0.7208 |

\*Chi-square test for categorical variables and Kruskal-Wallis test for continuous variables
